# Supplementary material for: Two-photon absorption and two-photon-induced isomerization of azobenzene compounds
Source: Royal Society of Chemistry journal article supplement (doi:10.1039/d0ra07693g), 2020-01-01
Supplement: d0ra07693g1.pdf [file d0ra07693g1.pdf]

## Supporting Information

### **Two-photon absorption and two-photon-induced isomerization of azobenzene compounds**

Marta Dudek, Nina Tarnowicz-Staniak, Marco Deiana, Ziemowit Pokładek, Marek Samoć and Katarzyna Matczyszyn\*

*Advanced Materials Engineering and Modelling Group, Faculty of Chemistry, Wrocław University of Science and Technology, Wyb. Wyspińskiego 27, 50-370 Wrocław, Poland*

Corresponding authors: [katarzyna.matczyszyn@pwr.edu.pl](mailto:katarzyna.matczyszyn@pwr.edu.pl) and [marta.ziemianek-dudek@pwr.edu.pl](mailto:marta.ziemianek-dudek@pwr.edu.pl)

**Table S1.** The values of the two-photon absorption cross section,  $\sigma_2$  (GM), determined for azobenzene derivatives.

| Structure of the azobenzene derivative                                              | $\sigma_2$ [GM] | $\lambda$ [nm] | Technique  | Ref .    |
|-------------------------------------------------------------------------------------|-----------------|----------------|------------|----------|
| 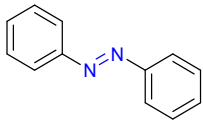   | 19              | 775            | fs- Z-scan | <b>1</b> |
|    | 90              | 775            |            | <b>1</b> |
|                                                                                     | 30              | 750            |            | <b>2</b> |
|    | 45              | 775            |            | <b>1</b> |
|                                                                                     | 50              | 750            |            | <b>2</b> |
|    | 120             | 775            |            | <b>1</b> |
|                                                                                     | 100             | 750            |            | <b>2</b> |
|                                                                                     | 118             | 944            |            | <b>3</b> |
|   | 410             | 775            |            | <b>1</b> |
|                                                                                     | 410             | 750            |            | <b>2</b> |
|  | 270             | 775            |            | <b>1</b> |
|                                                                                     | 185             | 750            |            | <b>2</b> |
|  | 490             | 775            |            | <b>1</b> |
|                                                                                     | 490             | 750            |            | <b>2</b> |
|  | 280             | 775            |            | <b>1</b> |
|                                                                                     | 150             | 750            | <b>2</b>   |          |
|  | 77              | 944            | <b>3</b>   |          |
|  | 178             | 973            | <b>3</b>   |          |

|                                                                                     |           |     |                     |          |
|-------------------------------------------------------------------------------------|-----------|-----|---------------------|----------|
| 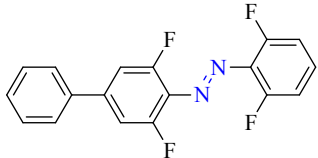   | 7.1       | 640 | bleach signal       | <b>4</b> |
|    | ~10       | 750 | fs-WLC <sup>a</sup> | <b>5</b> |
|    | ~80       | 850 |                     | <b>5</b> |
|    | 220       | 775 | fs-Z-scan           | <b>6</b> |
|   | 250       | 775 |                     |          |
|  | 260       | 775 |                     |          |
|  | 360       | 775 |                     |          |
|  | R=H: 298  | 780 |                     | <b>7</b> |
|                                                                                     | R=OH: 211 |     |                     |          |
|  | R=H: 1234 | 780 |                     | <b>7</b> |
|                                                                                     | R=OH: 987 |     |                     |          |

|                                                                                                                             |                                                                                                                                        |       |       |           |
|-----------------------------------------------------------------------------------------------------------------------------|----------------------------------------------------------------------------------------------------------------------------------------|-------|-------|-----------|
| 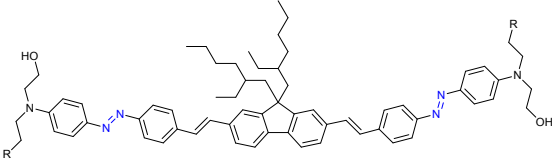                                           | R=H:<br>1251<br>R=OH:<br>1058                                                                                                          | 780   |       | <b>7</b>  |
|                                            | R:                                                    | 826   | 600   | <b>8</b>  |
| R:                                         | 829.3                                                                                                                                  |       |       |           |
| R:                                         | 578.2                                                                                                                                  |       |       |           |
|                                           | R <sub>1</sub> : NO <sub>2</sub><br>R <sub>2</sub> :  | ~ 125 | ~ 950 | <b>9</b>  |
| R <sub>1</sub> : CN<br>R <sub>2</sub> :  | ~ 250                                                                                                                                  | ~ 870 |       |           |
| R <sub>1</sub> : CN<br>R <sub>2</sub> :  | ~ 125                                                                                                                                  | ~ 920 |       |           |
|                                          | R=H                                                                                                                                    | 52    | 700   | <b>10</b> |
| R=NO <sub>2</sub>                                                                                                           | 124                                                                                                                                    | 670   |       |           |
| R=NMe <sub>2</sub>                                                                                                          | 145                                                                                                                                    | 825   |       |           |

|                                                                                   |        |       |        |           |
|-----------------------------------------------------------------------------------|--------|-------|--------|-----------|
| 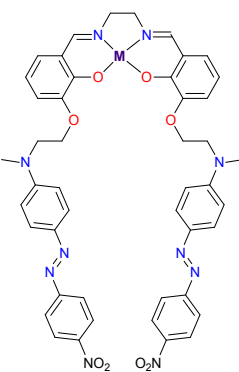 | M = Cu | ~ 400 | ~ 1000 | <b>11</b> |
|                                                                                   | M=Ni   | ~ 400 | ~ 1000 |           |

a) WLC - white-light continuum based method for measuring  $\sigma_2$

#### References:

1. L. De Boni, J. J. Rodrigues, D. S. dos Santos, C. H. T. P. Silva, D. T. Balogh, O. N. Oliveira, S. C. Zilio, L. Misoguti and C. R. Mendonça, *Chemical Physics Letters*, 2002, **374**, 684.
2. L. De Boni, L. Misoguti, S. C. Zilio and C. R. Mendonça, *ChemPhysChem*, 2005, **6**, 1121-1125.
3. L. Antonov, K. Kamada, K. Ohta and F. S. Kamounah, *Physical Chemistry Chemical Physics*, 2003, **5**, 1193-1197.
4. J. Moreno, M. Gerecke, A. L. Dobryakov, I. N. Ioffe, A. A. Granovsky, D. Bléger, S. Hecht and S. A. Kovalenko, *The Journal of Physical Chemistry B*, 2015, **119**, 12281-12288.
5. E. C. Carroll, S. Berlin, J. Levitz, M. A. Kienzler, Z. Yuan, D. Madsen, D. S. Larsen and E. Y. Isacoff, *Proceedings of the National Academy of Sciences of the United States of America*, 2015, **112**, E776-E785.
6. A. A. Andrade, S. B. Yamaki, L. Misoguti, S. C. Zilio, T. D. Z. Atvars, O. N. Oliveira and C. R. Mendonça, *Optical Materials*, 2004, **27**, 441-444.
7. R. D. Breukers, S. Janssens, S. G. Raymond, M. D. H. Bhuiyan and A. J. Kay, *Dyes and Pigments*, 2015, **112**, 17-23.
8. W. Xu, W. Wang, J. Li, Q. Wu, Y. Zhao, H. Hou and Y. Song, *Dyes and Pigments*, 2019, **160**, 1-8.
9. E. Piovesan, L. De Boni, E. Ishow and C. R. Mendonça, *Chemical Physics Letters*, 2010, **498**, 277-280.
10. Z. Pokladek, M. Dudek, O. Mongin, R. Métivier, P. Mlynarz, M. Samoc, K. Matczyszyn and F. Paul, *ChemPlusChem*, 2017, **82**, 1372-1383.
11. U. M. Neves, L. De Boni, Z. Ye, X. R. Bu and C. R. Mendonça, *Chemical Physics Letters*, 2007, **441**, 221-225.
